1 **Adventitious viruses persistently infect three commonly used mosquito cell lines**

2

3 James Weger-Lucarelli<sup>2§†</sup>, Claudia Rückert<sup>2§</sup>, Nathan D. Grubaugh<sup>2‡</sup>, Michael J. Misencik<sup>1</sup>,  
4 Philip M. Armstrong<sup>1</sup>, Mark D. Stenglein<sup>2</sup>, Gregory D. Ebel<sup>2</sup>, and Doug E. Brackney<sup>1#</sup>

5

6 <sup>1</sup>The Connecticut Agricultural Experiment Station, Center for Vector Biology and Zoonotic  
7 Diseases, New Haven, CT, USA

8 <sup>2</sup>Department of Microbiology, Immunology, and Pathology, Colorado State University, Fort  
9 Collins, CO, USA.

10

11 § these authors contributed equally

12 † Present address: Department of Biomedical Sciences and Pathobiology, Virginia Polytechnic  
13 Institute and State University 360 W Campus Drive, Blacksburg, Virginia, USA.

14 ‡ Present address: Department of Immunology and Microbial Science, The Scripps Research  
15 Institute, La Jolla, CA, USA.

16

17 # Corresponding author: [Doug.Brackney@ct.gov](mailto:Doug.Brackney@ct.gov)

18

19 Keywords: mosquito, virus, cell culture, insect-specific viruses

20

21 **Abstract**

22 Mosquito cell lines were first established in the 1960's and have been used extensively in  
23 research to isolate and propagate arthropod-borne (arbo-) viruses, study the invertebrate immune  
24 system, and understand virus-vector interactions. Despite their utility as an *in vitro* tool, these  
25 cell lines are poorly defined and may harbor insect-specific viruses that could impact  
26 experimental results. Accordingly, we screened four commonly-used mosquito cell lines, C6/36  
27 and U4.4 cells from *Aedes albopictus*, Aag2 cells from *Aedes aegypti*, and Hsu cells from *Culex*  
28 *quinquefasciatus*, for the presence of adventitious viruses. All four cell lines stained positive for  
29 double-stranded RNA by immunofluorescence, indicative of RNA virus replication. We  
30 subsequently identified viruses infecting Aag2, U4.4 and Hsu cell lines using untargeted next-  
31 generation sequencing, but not C6/36 cells. Sequences from viruses in the families *Birnaviridae*,  
32 *Bunyaviridae*, *Flaviviridae*, and *Rhabdoviridae* were abundant in the mosquito cell lines. PCR  
33 confirmation revealed that these sequences stem from active viral replication and/or integration  
34 into the cellular genome. Our results show that these commonly-used mosquito cell lines are  
35 persistently-infected with several viruses. This finding may be critical to interpreting data  
36 generated in these systems.

## 37 **Introduction**

38 Cell culture systems have revolutionized biomedical science and provided key insights  
39 into the fundamentals of life. The tractability of these systems make it possible to perform high-  
40 throughput drug screens and gene studies (Broach and Thorner, 1996; Perrimon and Mathey-  
41 Prevot, 2007), isolate and amplify viruses and develop vaccines (Enders et al., 1949; Lloyd et al.,  
42 1936; Rivers and Ward, 1935); experiments that would otherwise be too difficult or impossible  
43 to perform *in vivo*. Despite their utility, it has recently been shown that many commonly used  
44 mammalian cell lines are persistently infected with a myriad of viruses, possibly confounding the  
45 results generated in these cell lineages and highlighting the need for a better understanding of  
46 cell culture systems (Hué et al., 2010; Platt et al., 2009; Uphoff et al., 2010).

47 Developed in the 1960s (Grace, 1966; Peleg, 1968; Singh, 1967), mosquito cell culture  
48 systems have become an indispensable tool in the study of arthropod-borne (arbo)viruses. These  
49 systems have provided insights into virus evolution and virus-vector interactions and  
50 democratized research by allowing laboratories lacking mosquito facilities to investigate  
51 arboviruses (Vasilakis et al., 2009; Walker et al., 2014). In addition, they are routinely used to  
52 isolate and amplify arboviruses, specifically *Aedes albopictus*-derived C6/36 cells which are  
53 deficient in the primary antiviral pathway, RNA interference (Brackney et al., 2010). These  
54 systems are generated by macerating whole mosquito larvae or tissues and culturing amenable  
55 cells (Walker et al., 2014). This can be problematic because the culture may be composed of one  
56 or more unknown cell types. In addition, environmental contaminants such as insect-specific  
57 viruses (ISVs) may be unknowingly co-cultured as has been reported for *Drosophila* and tick cell  
58 lines (Bell-Sakyi and Attoui, 2013, 2016; Wu et al., 2010). In fact, ISVs have been identified in  
59 many mosquito species and both cell-fusing agent virus (CFAV; *Flaviviridae*) and Phasi-charoen

60 like virus (PCLV; *Bunyaviridae*) have been identified in *Aedes aegypti* Aag2 cells (Maringer et  
61 al., 2017; Roundy et al., 2017; Schultz et al., 2018; Stollar and Thomas, 1975). Together these  
62 data suggest that commonly used mosquito cells may be persistently infected with unknown  
63 viruses and defining the culture virome will be critical to properly interpreting data generated in  
64 these systems.

65 In this study, we investigated the possibility that commonly used mosquito cell lines may  
66 be persistently infected with ISVs. Using an anti-dsRNA specific antibody, we performed  
67 immunofluorescence on uninfected cultures of Aag2 (*Ae. aegypti*), U4.4 (*Ae. albopictus*), C6/36  
68 (*Ae. albopictus*) and Hsu (*Culex quinquefasciatus*) cells. We observed the presence of dsRNA in  
69 each cell line indicating the presence of ostensibly viral RNA. Subsequently, we sequenced RNA  
70 from these cell lines by next-generation sequencing (NGS) in order to better characterize the  
71 origins of this signal. We taxonomically categorized non-host sequences (Fauver et al., 2016a) to  
72 identify full-length or partial viral sequences in all cell lines. We further detected viral RNA by  
73 RT-PCR in cell supernatant and/or cell lysates and in some instances, DNA forms of RNA  
74 viruses. Together, these data demonstrate that many commonly used mosquito cell culture  
75 systems are persistently infected with ISVs; results which should be considered when  
76 interpreting data generated in these cell lines.

77

## 78 **Materials and Methods**

### 79 **Cell lines**

80 The *Cx. quinquefasciatus* ovary-derived Hsu (Hsu et al., 1970), *Ae. albopictus*-derived C6/36  
81 (Singh, 1967), and *Ae. aegypti*-derived Aag2 (Lan and Fallon, 1990; Peleg, 1968) cell lines were  
82 maintained at 28°C with 5% CO<sub>2</sub> in MEM supplemented with 10% fetal bovine serum (FBS),

83 1X nonessential amino acids (100x; ThermoFisher Scientific), 1% L-glutamine, 1% 100x  
84 antibiotic-antimycotic (10,000 mg/ml of streptomycin, 10,000 U/ml penicillin, and 25 mg/ml of  
85 amphotericin B), and 5% of a 7.5% sodium bicarbonate solution. *Ae. aegypti*-derived U4.4 cells  
86 were maintained at 28°C with 5% CO<sub>2</sub> in Mitsuhashi and Maramorosch insect medium  
87 supplemented with 7% FBS, 1X nonessential amino acids, L-glutamine, and antibiotics-  
88 antimycotics (10,000 mg/ml of streptomycin, 10,000 U/ml penicillin, and 25 mg/ml of  
89 amphotericin B). RNA was sequenced from three batches of C6/36 cells (two from Colorado  
90 State University and one from the Connecticut Agricultural Experiment Station) in order to  
91 provide insight into inter-laboratory variability. All three batches were originally acquired from  
92 ATCC.

93

#### 94 **West Nile virus infections**

95 Mosquito cells were plated in 12-well plates at concentrations between  $8.1 \times 10^5$  and  $1.8 \times 10^6$   
96 cells/ well on poly-L-lysine treated coverslips. Cells were infected with West Nile virus (WNV)  
97 strain 10679-06 at a multiplicity of infection (MOI) of 0.1. Mock infected cells were treated with  
98 media. The inoculated plates were incubated at 28°C for 1 hour, with manual rocking at 15  
99 minute intervals, to allow for virus adsorption. After the incubation period, 1 mL of media was  
100 added to each well and plates were placed in a 28°C incubator with 5% CO<sub>2</sub>. Both the  
101 experimental and control cells were harvested either 24 or 72 hours post infection (h.p.i.).

102

#### 103 **Immunofluorescence**

104 Cells were fixed in well with 4% paraformaldehyde for 20 min. at room temperature.  
105 Subsequently, cells were permeabilized (PBS + 0.3% TritonX100) for 10 min. at room  
106 temperature and incubated with blocking buffer (5% BSA + 0.1% TritonX100) at 4°C overnight.  
107 Coverslips were placed in a humid chamber, 50 µL of primary anti-dsRNA antibody (J2) diluted  
108 1:200 in blocking buffer was added to each, and incubated at room temperature for 1 hour.  
109 Coverslips were washed three times in wash buffer (PBS+0.1% Tween 20) and incubated with  
110 50 µL of secondary antibody (Alexa-Fluor 555 α-mouse) in the dark for 1 hour at room  
111 temperature. Coverslips were washed three additional times in wash buffer and mounted on glass  
112 slides with Prolong Gold anti-fade with DAPI counterstain. Slides were visualized on a Leica  
113 SP5 confocal microscope using the 405 nm laser (DAPI; nuclei) and 561 Argon laser (Alexa-  
114 Fluor 555; dsRNA) at 63x magnification. Brightness and contrast from resultant images were  
115 adjusted manually in Adobe Illustrator. All images were adjusted equally.

116

### 117 **Next-generation sequencing of cellular RNA**

118 RNA from cell lines was extracted using the Qiagen viral RNA kit and prepared for sequencing  
119 as previously described (Grubaugh et al., 2016). Briefly, each sample was DNase treated using  
120 Turbo DNase (Ambion). Total RNA was then non-specifically amplified and converted into  
121 dsDNA using the NuGEN Ovation RNA-Seq System V2. dsDNA was then sheared using the  
122 Covaris S2 Focused-ultrasonicator according to the manufacturer's recommendations.  
123 Sequencing libraries were prepared from sheared cDNA using NuGEN's Ovation Ultralow  
124 Library Kit according to the manufacturer's recommendations. Agencourt RNAClean XP beads  
125 (Beckman Coulter Genomics, Pasadena, CA) were used for all purification steps. Finished  
126 libraries were analyzed for correct size distribution using the Agilent Bioanalyzer High

127 Sensitivity DNA chips (Agilent). 100 nt paired-end reads were generated using the Illumina  
128 HiSeq 2500 platform at Beckman Coulter Genomics.

129

### 130 **Virus discovery pipeline**

131 An in-house virus discovery pipeline was used to identify novel viral sequences as previously  
132 described (Fauver et al., 2016a). Briefly, reads were first trimmed with cutadapt version 1.13  
133 (Martin, 2011) and then PCR duplicates were removed with CD-HIT-EST tool, version 4.6 (Li  
134 and Godzik, 2006). Sequences that mapped to the *Ae. aegypti* (GCF\_002204515.2), *Ae.*  
135 *albopictus* (GCF\_001876365.2), *An. Gambiae* (GCF\_000005575.2), or *Cu. Quinquefasciatus*  
136 (GCF\_000209185.1) genome assemblies were then removed by alignment with Bowtie2  
137 (Langmead and Salzberg, 2012). Remaining reads were assembled using the SPAdes genome  
138 assembler (Bankevich et al., 2012). The contigs produced were then aligned to the NCBI  
139 nucleotide database using BLASTn (Altschul et al., 1997; Camacho et al., 2009). Contigs that  
140 did not align at the nucleotide level with an e-value less than  $10^{-8}$  were then used for a  
141 translation-based search against protein sequences using the DIAMOND (Buchfink et al., 2015).  
142 Contigs whose highest scoring alignments were to virus sequences were manually inspected in  
143 Geneious v11 (Kearse et al., 2012), and validated by mapping reads back to assemblies using  
144 Bowtie2 as above.

145

### 146 **Viral RNA/ DNA detection by PCR**

147 Approximately  $8 \times 10^6$  cells of each cell line (Aag2, C6/36, Hsu and U4.4) were harvested by  
148 scraping, equally divided into two separate tubes (one for RNA and one for DNA), and pelleted

149 at 10,000xg at 4C for 5 minutes. Cell supernatant was removed and placed in two separate tubes.  
150 DNA was extracted from cell pellets using the Zymo Quick gDNA mini-prep. Samples for RNA  
151 extraction were all treated with DNase (Promega, Madison, WI) prior to extraction to remove  
152 cellular DNA. One of the tubes of cell supernatant was also subjected to RNase A  
153 (Thermofisher, 100µg/mL at 37C for one hour) treatment to remove unencapsidated RNA. RNA  
154 was extracted from cell pellets, cell supernatant, and RNase A treated RNA using the Zymo  
155 DirectZol RNA extraction kit. cDNA was produced from extracted RNA using Protoscript II RT  
156 (NEB) using random hexamers. DNA or cDNA was then used for PCR or qPCR using OneTaq  
157 DNA polymerase (NEB) or iTaq SYBR green (Biorad), respectively. All qPCRs were confirmed  
158 by running a gel to confirm the result visually. Primers used in this study are listed in Table 1.

159

## 160 **Data Availability Statement**

161 Raw sequencing reads can be found on the NCBI SRA database (BioProject # PRJNA464394).  
162 The accession numbers for the assembled viral contigs are PCLV L segment (MH310079),  
163 PCLV M segment (MH310080), PCLV S segment (MH310081), CFAV (MH310082), MERDV  
164 (MH310083), CYV segment A (MH310084), and CYV segment B (MH310085). Aliquots of  
165 cell lines are available upon request.

166

## 167 **Results**

### 168 **Detection of dsRNA in mosquito cells**

169 There are numerous reports of invertebrate cell cultures systems persistently infected  
170 with ISVs (Bell-Sakyi and Attoui, 2013, 2016; Wu et al., 2010); however, the extent to which



171 commonly used mosquito cell culture systems are infected remains unknown. Therefore, we  
172 screened Aag2, C6/36, U4.4, and Hsu cells for the presence of dsRNA. Not normally expressed  
173 in eukaryotic cells, dsRNA can be readily detected in cells infected with ssRNA, dsRNA, and  
174 DNA viruses using the anti-dsRNA antibody, J2 (Weber et al., 2006). We used WNV infected  
175 (24 and 72 h.p.i.) and uninfected cultures of each of the four cell lines as controls for our  
176 immunofluorescence assays. As expected, we detected WNV dsRNA in all four cell lines with  
177 increasing signal intensity with time post infection suggesting active WNV replication (Fig. 1).  
178 Interestingly, we found that all of the uninfected cultures also stained positive for dsRNA (Fig.  
179 1). While Aag2 cells are known to be infected with CFAV (Scott et al., 2010; Stollar and  
180 Thomas, 1975) and PCLV (Maringer et al., 2017), and stained positive for dsRNA (Fig. 1A), we  
181 also found that a large proportion of C6/36, U4.4 and Hsu cells stained positive for dsRNA (Fig.  
182 1B-D). These data suggest that all four cell lines are persistently infected with at least one virus.

183

#### 184 **Viral sequences are abundant in mosquito cell lines**

185 To confirm our immunostaining results indicating virus infection and to identify possible  
186 viruses, we implemented an unbiased NGS approach to sequence total RNA from the cell lines.  
187 We identified a number of sequences with similarity to virus genomes (Table 2). As expected,  
188 we found sequences aligning to PCLV and CFAV in Aag2 cells (Maringer et al., 2017; Schultz  
189 et al., 2018; Scott et al., 2010; Stollar and Thomas, 1975). Sequences aligning to PCLV shared  
190 99.8% nucleotide sequence similarity with the Aag2 Bristol strains. We recovered reads  
191 spanning 99.9% of each of the three PCLV segments, L, M and S. Similarly the reads aligning to  
192 CFAV shared 99.8% sequence similarity to the Aag2 Bristol strain of CFAV with 94.3% of the  
193 genome covered. Sequences aligning to WNV and Culiseta flavivirus were also identified;

194 however, we believe these may represent contaminants introduced during library preparation, as  
195 libraries from both of these viruses had been recently prepared in the same laboratory (Grubaugh  
196 et al., 2016; Misencik et al., 2016). To determine whether the CFAV and PCLV sequences stem  
197 from active viral replication, integration into the cellular genome or possibly both, we confirmed  
198 the presence of viral RNA and DNA in the cell, as well as RNA in the cell supernatant prior to  
199 and following RNase A treatment. PCLV RNA was detected in the cellular lysate and  
200 supernatant, however, RNA was not detected after RNase A treatment of the supernatant prior to  
201 RNA extraction. Interestingly, we did not detect PCLV in the cellular DNA suggesting that the  
202 PCLV sequences are not derived from genomically integrated viral elements. Despite the lack of  
203 RNase A protected viral RNA in the supernatant, the almost complete coverage across the length  
204 of the genome suggests active replication. CFAV was detected in both DNA and RNA forms in  
205 the lysates and supernatants with and without RNase A suggesting that CFAV is actively  
206 replicating in Aag2 cells and extrachromosomal or integrated DNA forms exist in the cell.

207 C6/36 and U4.4 cells are both derived from *Aedes albopictus* and, in fact, are subclones  
208 of the original culture (Igarashi, 1978; Miller and Brown, 1992; Singh, 1967). It is unclear when  
209 the two cell lines were cultured and maintained separately, but presumably occurred during  
210 cloning experiments of Singh's *Ae. albopictus* (SAAR) cells in 1978 when the C6/36 subclone  
211 was first isolated (Igarashi, 1978). While some putative virus-like contigs with partial or  
212 disrupted ORFs were identified in each of the three C6/36 cell batches, signatures of bona fide  
213 viruses were not identified. In contrast, in U4.4 cells we identified reads aligning to Culex Y  
214 virus (CYV), a bisegmented member of the family *Birnaviridae* that was recently identified in  
215 *Culex pipiens* mosquitoes (Marklewitz et al., 2012). The fact that CYV was identified in U4.4  
216 cells and not C6/36 cells suggests that CYV infection of U4.4 cells occurred after the two cell

217 lines were subcloned or that infection was lost in one lineage. Reads aligning to segment A had  
218 99.5% nucleotide sequence similarity and covered 89.6% of the segment and reads aligning to  
219 segment B had 99.3% similarity spanning 94% of the segment. While we were able to detect  
220 RNA and DNA forms of CYV in the lysates and supernatants, we did not detect CYV RNA  
221 following RNase A treatment; however, as before, the identification of almost complete genome  
222 sequences from both segments would suggest that CYV is actively replicating in U4.4 cells.

223         We identified one full length genome with nucleotide sequence similarity (95.8%) to  
224 Merida virus (MERDV) in the *Cx. quinquefasciatus* Hsu cells. MERDV is a member of the  
225 family *Rhabdoviridae* and was initially discovered in pools of *Cx. quinquefasciatus* and  
226 *Ochlerotatus* spp. mosquitoes (Charles et al., 2016). MERDV RNA could be detected in both the  
227 lysates and supernatants, but could not be detected in cellular DNA or RNase A treated  
228 supernatants. Attempts to passage this virus on C6/36 cells were unsuccessful (data not shown).  
229 Despite these results, the fact that we identified the near complete genome suggests that MERDV  
230 is actively replicating in Hsu cells.

231

## 232 **Discussion**

233         It is well known that insects, including mosquitoes, harbor numerous insect-specific  
234 viruses in both wild and laboratory populations (Bolling et al., 2015; Fauver et al., 2016b; Li et  
235 al., 2015; Shi et al., 2016). Because mosquito cell lines are generated from these source  
236 materials, it is not surprising that ISVs have been identified in mosquito cell cultures (Maringer  
237 et al., 2017; Scott et al., 2010). However, the prevalence and taxonomic composition of ISVs in  
238 mosquito cell culture systems are unknown. Accordingly, in this study we characterized the  
239 viromes of four commonly used mosquito cell lines: Aag2, C6/36, U4.4, and Hsu cells.

240 From our NGS data we were able to fully reconstruct MERDV; however, we were unable  
241 to detect RNase A protected viral RNA in the cell supernatant and, as others have demonstrated,  
242 we were unable to recover MERDV after passage on C6/36 cells (Charles et al., 2016).  
243 Similarly, despite identifying an almost complete genome from PCLV and, as described by  
244 others, the presence of PCLV proteins (Maringer et al., 2017), we were unable to detect  
245 protected RNA in Aag2 cell supernatant. Further, we did not detect signatures of either virus in  
246 the cellular DNA suggesting that these were not products of integrated sequences. It is possible  
247 that these viruses are more prone than other viruses to RNase A degradation. In fact, a previous  
248 study found that *Bunyaviridae* nucleocapsids are susceptible to RNase A concentrations of 100  
249 ug/ ml, the concentration used in the preparation of our samples (Osborne and Elliott, 2000).  
250 This could explain our inability to detect PCLV in RNase A treated supernatants. It is unclear if  
251 similar concentration-dependent RNase A sensitivity could explain our inability to detect  
252 encapsidated MERDV which is a member of the family *Rhabdoviridae*. Regardless, the presence  
253 of a fully intact MERDV genome and the lack of integration is highly suggestive that MERDV  
254 maintains an active and persistent infection of Hsu cells.

255 Immunofluorescence staining of C6/36 cells revealed the presence of dsRNA and  
256 presumably viruses; however, our NGS analysis did not identify signatures of bona fide viruses.  
257 These incongruent findings suggest that intracellular dsRNA originate from sources other than  
258 actively replicating virus such as cellular dsRNA molecules. We did identify a number of partial  
259 or disrupted virus-like ORFs and it is therefore possible that the dsRNA signal could arise from  
260 endogenous viral elements (EVE). Mechanistically this could occur by EVE transcripts folding  
261 back upon themselves or from convergent EVE transcripts, both of which would generate

262 dsRNA substrates. The origin of the EVEs is unknown, but likely represent ancient viral  
263 infections that had integrated into the genome of the original cell culture source.

264 C6/36 cells lack a functional antiviral RNAi pathway (Brackney et al., 2010) which  
265 makes them ideal for propagating arboviruses in the laboratory. This deficiency has been mapped  
266 to a homozygous frame-shift mutation in the *dcr-2* gene resulting in a premature termination  
267 codon (Morazzani et al., 2012). Conversely, U4.4, Aag2 and Hsu cells have fully functional  
268 RNAi responses and, consequently, propagation of viruses in these cell lines typically generates  
269 much lower titers than C6/36 cells (Paradkar et al., 2012; Scott et al., 2010; Siu et al., 2011). In  
270 this study we demonstrate that U4.4, Aag2, and Hsu cells are persistently infected with viruses,  
271 but that C6/36 cells have remained uninfected. The symmetry between viral infection and RNAi  
272 functionality is intriguing. Based on our findings, we speculate that because C6/36 cells are  
273 maintained in a sterile culture environment devoid of viruses there is no selective advantage to  
274 maintain a functional antiviral RNAi pathway. Consequently, once a mutation arose in the *dcr-2*  
275 gene it was able to spread throughout the culture without the culture experiencing fitness losses.

276 Numerous endogenous flavivirus elements have been identified in mosquito cells and  
277 mosquitoes suggesting that genomic incorporation of RNA viruses is a common occurrence  
278 (Crochu et al., 2004; Suzuki et al., 2017). The process by which the genomes of non-retrovirus  
279 RNA viruses can integrate was recently described by Goic *et al.* (2013 & 2016). They found that  
280 the integration of RNA virus genomes into the genomes of mosquito cells and mosquitoes is  
281 mediated by endogenous retrotransposon reverse transcriptase activity. It is thought that this  
282 process helps control persistent RNA viruses. All of the viruses reported here are RNA viruses,  
283 yet we detected DNA forms of CFAV and CYV and not PCLV or MERDV. This could represent  
284 a discrepancy in the template selection preferences associated with this process. In fact, this

285 endogenous retrotransposon reverse transcriptase mediated process has only been demonstrated  
286 for positive-sense single-stranded RNA viruses like CFAV (Goic et al., 2016; Goic et al., 2013)  
287 and it is therefore not surprising that DNA forms of CFAV were detected. Interestingly, CYV is  
288 a member of the family *Birnaviridae* and has a double stranded RNA genome. The presence of  
289 CYV DNA forms suggests that dsRNA can also serve as a template for the production of  
290 extrachromosomal or integrated viral DNA; however, we were unable to detect DNA forms of  
291 either PCLV (*Bunyaviridae*) or MERDV (*Rhabdoviridae*) both of which have negative-sense  
292 single-stranded RNA genomes. Genetic signatures of other negative strand virus have been  
293 found integrated into the *Aedes aegypti* genome (Katzourakis and Gifford, 2010) which suggests  
294 that genetic elements derived from PCLV and MERDV have not yet integrated into the genome  
295 or that integrated elements exist but have diverged from the consensus sequence and, therefore,  
296 were not efficiently amplified during PCR.

297         It is unclear at this time how or if these persistent viral contaminants have affected the  
298 outcomes of mosquito cell-based studies. It is known that viruses can drastically alter cellular  
299 homeostasis, lipid levels and distribution, organelle abundance and integrity, cellular RNA  
300 levels, protein abundance and antiviral defense mechanisms. For example, members of the  
301 family *Bunyaviridae*, like PCLV identified in Aag2 and C6/36 cells, drastically alter cellular  
302 mRNA levels through “cap-snatching” and viral suppressors of RNA interference have been  
303 identified in numerous insect-specific viruses (Hopkins et al., 2013; van Cleef et al., 2011). In  
304 addition, it is known that viruses can interact with one another. Recently, it was demonstrated  
305 that CFAV and dengue virus can synergistically promote the replication of one another during  
306 infection of Aag2 cells (Zhang et al., 2017). Conversely, others have found that these viruses can  
307 interfere with arboviral replication (Goenaga et al., 2015). Such findings suggest that the

308 persistent viral infections identified in this study could affect the outcomes of arbovirus  
309 evolution and virus-vector interaction studies performed in these cell lines. Clearly defining  
310 model systems is paramount to properly interpreting results generated in these systems. This  
311 study better defines mosquito cell culture systems, the results from which can be used to improve  
312 experimental design and interpretation of results.

313

### 314 **Acknowledgements**

315 This work was supported in part by grants from the Centers for Disease Control and Prevention  
316 (U50/CCU116806-01 and U01/CK000509-01), the US Department of Agriculture Hatch Funds  
317 and Multistate Research Project (CONH00773 and NE1443), and the National Institute of  
318 Health, National Institute of Allergy and Infectious Diseases (AI067380), and NIH/NCATS  
319 (UL1 TR001082).

### 320 **Contributions**

321 Conception and design: J.W-L., C.R., N.D.G., P.M.A., D.E.B, G.D.E. Acquisition of data: J.W-  
322 L., C.R., M.J.M. and N.D.G. Analysis and interpretation of data: M.D.S., J.W-L., and C.R.  
323 Writing of the manuscript: D.E.B, P.M.A., J.W-L. and C.R. Study supervision: P.M.A., D.E.B  
324 and G.D.E. All authors have critically evaluated and approved the final manuscript.

325

### 326 **Competing Interests**

327 The authors declare that they have no competing interests.

328

## 329 **References**

- 330 Altschul, S.F., Madden, T.L., Schaffer, A.A., Zhang, J., Zhang, Z., Miller, W., Lipman, D.J., 1997. Gapped  
331 BLAST and PSI-BLAST: a new generation of protein database search programs. *Nucleic Acids Res* 25,  
332 3389-3402.
- 333 Bankevich, A., Nurk, S., Antipov, D., Gurevich, A.A., Dvorkin, M., Kulikov, A.S., Lesin, V.M., Nikolenko, S.I.,  
334 Pham, S., Prjibelski, A.D., Pyshkin, A.V., Sirotkin, A.V., Vyahhi, N., Tesler, G., Alekseyev, M.A., Pevzner,  
335 P.A., 2012. SPAdes: a new genome assembly algorithm and its applications to single-cell sequencing. *J*  
336 *Comput Biol* 19, 455-477.
- 337 Bell-Sakyi, L., Attoui, H., 2013. Endogenous tick viruses and modulation of tick-borne pathogen growth.  
338 *Frontiers in cellular and infection microbiology* 3, 25.
- 339 Bell-Sakyi, L., Attoui, H., 2016. Virus Discovery Using Tick Cell Lines. *Evolutionary bioinformatics online*  
340 12, 31-34.
- 341 Bolling, B.G., Vasilakis, N., Guzman, H., Widen, S.G., Wood, T.G., Popov, V.L., Thangamani, S., Tesh, R.B.,  
342 2015. Insect-specific viruses detected in laboratory mosquito colonies and their potential implications  
343 for experiments evaluating arbovirus vector competence. *Am J Trop Med Hyg* 92, 422-428.
- 344 Brackney, D.E., Scott, J.C., Sagawa, F., Woodward, J.E., Miller, N.A., Schilkey, F.D., Mudge, J., Wilusz, J.,  
345 Olson, K.E., Blair, C.D., Ebel, G.D., 2010. C6/36 *Aedes albopictus* cells have a dysfunctional antiviral RNA  
346 interference response. *PLoS neglected tropical diseases* 4, e856.
- 347 Broach, J.R., Thorner, J., 1996. High-throughput screening for drug discovery. *Nature* 384, 14-16.
- 348 Buchfink, B., Xie, C., Huson, D.H., 2015. Fast and sensitive protein alignment using DIAMOND. *Nature*  
349 *methods* 12, 59-60.
- 350 Camacho, C., Coulouris, G., Avagyan, V., Ma, N., Papadopoulos, J., Bealer, K., Madden, T.L., 2009.  
351 BLAST+: architecture and applications. *BMC bioinformatics* 10, 421.
- 352 Charles, J., Firth, A.E., Lorono-Pino, M.A., Garcia-Rejon, J.E., Farfan-Ale, J.A., Lipkin, W.I., Blitvich, B.J.,  
353 Briese, T., 2016. Merida virus, a putative novel rhabdovirus discovered in *Culex* and *Ochlerotatus* spp.  
354 mosquitoes in the Yucatan Peninsula of Mexico. *J Gen Virol* 97, 977-987.
- 355 Crochu, S., Cook, S., Attoui, H., Charrel, R.N., De Chesse, R., Belhouchet, M., Lemasson, J.J., de Micco, P.,  
356 de Lamballerie, X., 2004. Sequences of flavivirus-related RNA viruses persist in DNA form integrated in  
357 the genome of *Aedes* spp. mosquitoes. *J Gen Virol* 85, 1971-1980.
- 358 Enders, J.F., Weller, T.H., Robbins, F.C., 1949. Cultivation of the Lansing Strain of Poliomyelitis Virus in  
359 Cultures of Various Human Embryonic Tissues. *Science* 109, 85-87.
- 360 Fauver, J.R., Grubaugh, N.D., Krajacich, B.J., Weger-Lucarelli, J., Lakin, S.M., Fakoli, L.S., 3rd, Bolay, F.K.,  
361 DiClaro, J.W., 2nd, Dabire, K.R., Foy, B.D., Brackney, D.E., Ebel, G.D., Stenglein, M.D., 2016a. West African  
362 *Anopheles gambiae* mosquitoes harbor a taxonomically diverse virome including new insect-specific  
363 flaviviruses, mononegaviruses, and totiviruses. *Virology* 498, 288-299.
- 364 Fauver, J.R., Grubaugh, N.D., Krajacich, B.J., Weger-Lucarelli, J., Lakin, S.M., Fakoli, L.S., 3rd, Bolay, F.K.,  
365 DiClaro, J.W., 2nd, Dabire, K.R., Foy, B.D., Brackney, D.E., Ebel, G.D., Stenglein, M.D., 2016b. West African  
366 *Anopheles gambiae* mosquitoes harbor a taxonomically diverse virome including new insect-specific  
367 flaviviruses, mononegaviruses, and totiviruses. *Virology* 498, 288-299.
- 368 Goenaga, S., Kenney, J.L., Duggal, N.K., Delorey, M., Ebel, G.D., Zhang, B., Levis, S.C., Enria, D.A., Brault,  
369 A.C., 2015. Potential for Co-Infection of a Mosquito-Specific Flavivirus, Nhumirim Virus, to Block West  
370 Nile Virus Transmission in Mosquitoes. *Viruses* 7, 5801-5812.
- 371 Goic, B., Stapleford, K.A., Frangeul, L., Doucet, A.J., Gausson, V., Blanc, H., Schemmel-Jofre, N., Cristofari,  
372 G., Lambrechts, L., Vignuzzi, M., Saleh, M.C., 2016. Virus-derived DNA drives mosquito vector tolerance  
373 to arboviral infection. *Nat Commun* 7, 12410.



374 Goic, B., Vodovar, N., Mondotte, J.A., Monot, C., Frangeul, L., Blanc, H., Gausson, V., Vera-Otarola, J.,  
375 Cristofari, G., Saleh, M.C., 2013. RNA-mediated interference and reverse transcription control the  
376 persistence of RNA viruses in the insect model *Drosophila*. *Nat Immunol* 14, 396-403.  
377 Grace, T.D., 1966. Establishment of a line of mosquito (*Aedes aegypti* L.) cells grown in vitro. *Nature* 211,  
378 366-367.  
379 Grubaugh, N.D., Weger-Lucarelli, J., Murrieta, R.A., Fauver, J.R., Garcia-Luna, S.M., Prasad, A.N., Black,  
380 W.C.t., Ebel, G.D., 2016. Genetic Drift during Systemic Arbovirus Infection of Mosquito Vectors Leads to  
381 Decreased Relative Fitness during Host Switching. *Cell Host Microbe* 19, 481-492.  
382 Hopkins, K.C., McLane, L.M., Maqbool, T., Panda, D., Gordesky-Gold, B., Cherry, S., 2013. A genome-wide  
383 RNAi screen reveals that mRNA decapping restricts bunyaviral replication by limiting the pools of Dcp2-  
384 accessible targets for cap-snatching. *Genes Dev* 27, 1511-1525.  
385 Hsu, S.H., Mao, W.H., Cross, J.H., 1970. Establishment of a line of cells derived from ovarian tissue of  
386 *Culex quinquefasciatus* Say. *J Med Entomol* 7, 703-707.  
387 Hué, S., Gray, E.R., Gall, A., Katzourakis, A., Tan, C.P., Houldcroft, C.J., McLaren, S., Pillay, D., Futreal, A.,  
388 Garson, J.A., Pybus, O.G., Kellam, P., Towers, G.J., 2010. Disease-associated XMRV sequences are  
389 consistent with laboratory contamination. *Retrovirology* 7, 111.  
390 Igarashi, A., 1978. Isolation of a Singh's *Aedes albopictus* cell clone sensitive to Dengue and Chikungunya  
391 viruses. *J Gen Virol* 40, 531-544.  
392 Katzourakis, A., Gifford, R.J., 2010. Endogenous Viral Elements in Animal Genomes. *PLoS genetics* 6,  
393 e1001191.  
394 Kearse, M., Moir, R., Wilson, A., Stones-Havas, S., Cheung, M., Sturrock, S., Buxton, S., Cooper, A.,  
395 Markowitz, S., Duran, C., Thierer, T., Ashton, B., Meintjes, P., Drummond, A., 2012. Geneious Basic: an  
396 integrated and extendable desktop software platform for the organization and analysis of sequence  
397 data. *Bioinformatics* 28, 1647-1649.  
398 Lan, Q., Fallon, A.M., 1990. Small heat shock proteins distinguish between two mosquito species and  
399 confirm identity of their cell lines. *Am J Trop Med Hyg* 43, 669-676.  
400 Langmead, B., Salzberg, S.L., 2012. Fast gapped-read alignment with Bowtie 2. *Nature methods* 9, 357-  
401 359.  
402 Li, C.X., Shi, M., Tian, J.H., Lin, X.D., Kang, Y.J., Chen, L.J., Qin, X.C., Xu, J., Holmes, E.C., Zhang, Y.Z., 2015.  
403 Unprecedented genomic diversity of RNA viruses in arthropods reveals the ancestry of negative-sense  
404 RNA viruses. *eLife* 4.  
405 Li, W., Godzik, A., 2006. Cd-hit: a fast program for clustering and comparing large sets of protein or  
406 nucleotide sequences. *Bioinformatics* 22, 1658-1659.  
407 Lloyd, W., Theiler, M., Ricci, N.I., 1936. Modification of the virulence of yellow fever virus by cultivation  
408 in tissues in vitro. *Transactions of the Royal Society of Tropical Medicine and Hygiene* 29, 481-529.  
409 Maringer, K., Yousuf, A., Heesom, K.J., Fan, J., Lee, D., Fernandez-Sesma, A., Bessant, C., Matthews, D.A.,  
410 Davidson, A.D., 2017. Proteomics informed by transcriptomics for characterising active transposable  
411 elements and genome annotation in *Aedes aegypti*. *BMC genomics* 18, 101.  
412 Marklewitz, M., Gloza-Rausch, F., Kurth, A., Kummerer, B.M., Drosten, C., Junglen, S., 2012. First  
413 isolation of an Entomobirnavirus from free-living insects. *J Gen Virol* 93, 2431-2435.  
414 Martin, M., 2011. Cutadapt removes adapter sequences from high-throughput sequencing reads. 2011  
415 17.  
416 Miller, M.L., Brown, D.T., 1992. Morphogenesis of Sindbis virus in three subclones of *Aedes albopictus*  
417 (mosquito) cells. *J Virol* 66, 4180-4190.  
418 Misencik, M.J., Grubaugh, N.D., Andreadis, T.G., Ebel, G.D., Armstrong, P.M., 2016. Isolation of a Novel  
419 Insect-Specific Flavivirus from *Culiseta melanura* in the Northeastern United States. *Vector Borne*  
420 *Zoonotic Dis* 16, 181-190.

421 Morazzani, E.M., Wiley, M.R., Murreddu, M.G., Adelman, Z.N., Myles, K.M., 2012. Production of Virus-  
422 Derived Ping-Pong-Dependent piRNA-like Small RNAs in the Mosquito Soma. *PLoS Pathog* 8, e1002470.  
423 Osborne, J.C., Elliott, R.M., 2000. RNA Binding Properties of Bunyamwera Virus Nucleocapsid Protein  
424 and Selective Binding to an Element in the 5' Terminus of the Negative-Sense S Segment. *J Virol* 74,  
425 9946-9952.

426 Paradkar, P.N., Trinidad, L., Voysey, R., Duchemin, J.-B., Walker, P.J., 2012. Secreted Vago restricts West  
427 Nile virus infection in *Culex* mosquito cells by activating the Jak-STAT pathway. *Proceedings of the*  
428 *National Academy of Sciences* 109, 18915-18920.

429 Peleg, J., 1968. Growth of arboviruses in monolayers from subcultured mosquito embryo cells. *Virology*  
430 35, 617-619.

431 Perrimon, N., Mathey-Prevot, B., 2007. Applications of High-Throughput RNA Interference Screens to  
432 Problems in Cell and Developmental Biology. *Genetics* 175, 7-16.

433 Platt, E.J., Bilska, M., Kozak, S.L., Kabat, D., Montefiori, D.C., 2009. Evidence that Ecotropic Murine  
434 Leukemia Virus Contamination in TZM-bl Cells Does Not Affect the Outcome of Neutralizing Antibody  
435 Assays with Human Immunodeficiency Virus Type 1. *J Virol* 83, 8289-8292.

436 Rivers, T.M., Ward, S.M., 1935. JENNERIAN PROPHYLAXIS BY MEANS OF INTRADERMAL INJECTIONS OF  
437 CULTURE VACCINE VIRUS. *J Exp Med* 62, 549-560.

438 Roundy, C.M., Azar, S.R., Rossi, S.L., Weaver, S.C., Vasilakis, N., 2017. Insect-Specific Viruses: A Historical  
439 Overview and Recent Developments. *Adv Virus Res* 98, 119-146.

440 Schultz, M.J., Frydman, H.M., Connor, J.H., 2018. Dual Insect specific virus infection limits Arbovirus  
441 replication in *Aedes* mosquito cells. *Virology* 518, 406-413.

442 Scott, J.C., Brackney, D.E., Campbell, C.L., Bondu-Hawkins, V., Hjelle, B., Ebel, G.D., Olson, K.E., Blair,  
443 C.D., 2010. Comparison of Dengue Virus Type 2-Specific Small RNAs from RNA Interference-Competent  
444 and –Incompetent Mosquito Cells. *PLoS Negl Trop Dis* 4, e848.

445 Shi, M., Lin, X.D., Tian, J.H., Chen, L.J., Chen, X., Li, C.X., Qin, X.C., Li, J., Cao, J.P., Eden, J.S., Buchmann, J.,  
446 Wang, W., Xu, J., Holmes, E.C., Zhang, Y.Z., 2016. Redefining the invertebrate RNA virosphere. *Nature*.

447 Singh, K.R.P., 1967. Cell Cultures Derived from Larvae of *Aedes Albopictus* (Skuse) and *Aedes Aegypti* (L).  
448 *Curr Sci India* 36, 506-&.

449 Siu, R.W., Fragkoudis, R., Simmonds, P., Donald, C.L., Chase-Topping, M.E., Barry, G., Attarzadeh-Yazdi,  
450 G., Rodriguez-Andres, J., Nash, A.A., Merits, A., Fazakerley, J.K., Kohl, A., 2011. Antiviral RNA interference  
451 responses induced by Semliki Forest virus infection of mosquito cells: characterization, origin, and  
452 frequency-dependent functions of virus-derived small interfering RNAs. *J Virol* 85, 2907-2917.

453 Stollar, V., Thomas, V.L., 1975. An agent in the *Aedes aegypti* cell line (Peleg) which causes fusion of  
454 *Aedes albopictus* cells. *Virology* 64, 367-377.

455 Suzuki, Y., Frangeul, L., Dickson, L.B., Blanc, H., Verdier, Y., Vinh, J., Lambrechts, L., Saleh, M.-C., 2017.  
456 Uncovering the Repertoire of Endogenous Flaviviral Elements in *Aedes* Mosquito Genomes. *J Virol* 91,  
457 e00571-00517.

458 Uphoff, C.C., Denkmann, S.A., Steube, K.G., Drexler, H.G., 2010. Detection of EBV, HBV, HCV, HIV-1,  
459 HTLV-I and -II, and SMRV in Human and Other Primate Cell Lines. *Journal of Biomedicine and*  
460 *Biotechnology* 2010, 23.

461 van Cleef, K.W., van Mierlo, J.T., van den Beek, M., van Rij, R.P., 2011. Identification of viral suppressors  
462 of RNAi by a reporter assay in *Drosophila* S2 cell culture. *Methods Mol Biol* 721, 201-213.

463 Vasilakis, N., Dearnorff, E.R., Kenney, J.L., Rossi, S.L., Hanley, K.A., Weaver, S.C., 2009. Mosquitoes Put  
464 the Brake on Arbovirus Evolution: Experimental Evolution Reveals Slower Mutation Accumulation in  
465 Mosquito Than Vertebrate Cells. *PLoS Pathog* 5, e1000467.

466 Walker, T., Jeffries, C.L., Mansfield, K.L., Johnson, N., 2014. Mosquito cell lines: history, isolation,  
467 availability and application to assess the threat of arboviral transmission in the United Kingdom.  
468 *Parasites & vectors* 7, 382.

469 Weber, F., Wagner, V., Rasmussen, S.B., Hartmann, R., Paludan, S.R., 2006. Double-Stranded RNA Is  
470 Produced by Positive-Strand RNA Viruses and DNA Viruses but Not in Detectable Amounts by Negative-  
471 Strand RNA Viruses. *J. Virol.* 80, 5059-5064.

472 Wu, Q., Luo, Y., Lu, R., Lau, N., Li, W.X., Ding, S.W., 2010. Virus discovery by deep sequencing and  
473 assembly of virus-derived small silencing RNAs. *Proc. Natl. Acad. Sci. U. S. A.* 107

474 1606-1611.

475 Zhang, G., Asad, S., Khromykh, A.A., Asgari, S., 2017. Cell fusing agent virus and dengue virus mutually  
476 interact in *Aedes aegypti* cell lines. *Scientific reports* 7, 6935.

477

478

479

480

481

482

483

484

485

486

487

488

489

490

491

492

493 **Tables and Figures:**

494 **Table 1: List of primers.**

| <b>Closest Virus Match</b>                  | <b>Forward Primer</b>   | <b>Reverse Primer</b>   | <b>Size</b> |
|---------------------------------------------|-------------------------|-------------------------|-------------|
| <b>Phasi Charoen like virus (L segment)</b> | TCTCGCCATTCTTGGTCAAC    | AACCCAATGTGTCCTGGATT    | 257         |
| <b>Cell Fusing Agent virus</b>              | CTGGACTGCACGAATGTACGCC  | ATCTCCAGGAGACCGTGTGCAG  | 367         |
| <b>Culex Y Virus (segment B)</b>            | AGGCTAAGAGGGAAGGAGTTGCT | AGTTCTGTGATGTCGGTGGCTTC | 364         |
| <b>Merida Virus</b>                         | GTGCCGGAAAGTGAAGGACAA   | GTGCGGGGATGAATCAATCTC   | 318         |

495

496

497

498

499

500

501

502

503

504

505

506

507

508

509

510 **Table 2: Viruses identified by NGS and RT-PCR in mosquito cell lines.**

| Cell Line   | Closest Virus Match                | Accession # | Virus Family         | Largest Contig (nt) | % nt identity | % Coverage | Lysate |      | Supernatant  |              |
|-------------|------------------------------------|-------------|----------------------|---------------------|---------------|------------|--------|------|--------------|--------------|
|             |                                    |             |                      |                     |               |            | RNA    | DNA  | RNA (-RNase) | RNA (+RNase) |
| <b>Aag2</b> | Phasi Charoen like virus L segment | KU936055.1  | <i>Bunyaviridae</i>  | 6789                | 99.8          | 99.9       | +      | -    | +            | -            |
|             | M segment                          | KU936056.1  |                      | 3847                | 99.8          | 99.9       | n.d.   | n.d. | n.d.         | n.d.         |
|             | S segment                          | KU936057.1  |                      | 1332                | 99.8          | 99.9       | n.d.   | n.d. | n.d.         | n.d.         |
|             | Cell Fusing Agent virus            | KU936054.1  | <i>Flaviviridae</i>  | 10,067              | 99.8          | 94.3       | +      | +    | +            | +            |
| <b>U4.4</b> | Culex Y Virus segment A            | JQ659254.1  | <i>Birnaviridae</i>  | 2778                | 99.5          | 89.6       | +      | +    | +            | -            |
|             | Segment B                          | JQ659255.1  |                      | 2959                | 99.3          | 94         |        |      |              |              |
| <b>Hsu</b>  | Merida Virus                       | KU194360.1  | <i>Rhabdoviridae</i> | 11,715              | 95.8          | 99.3       | +      | -    | +            | -            |

511

512

513

514

515

516

517

518

519

520

521 **Figure 1:**

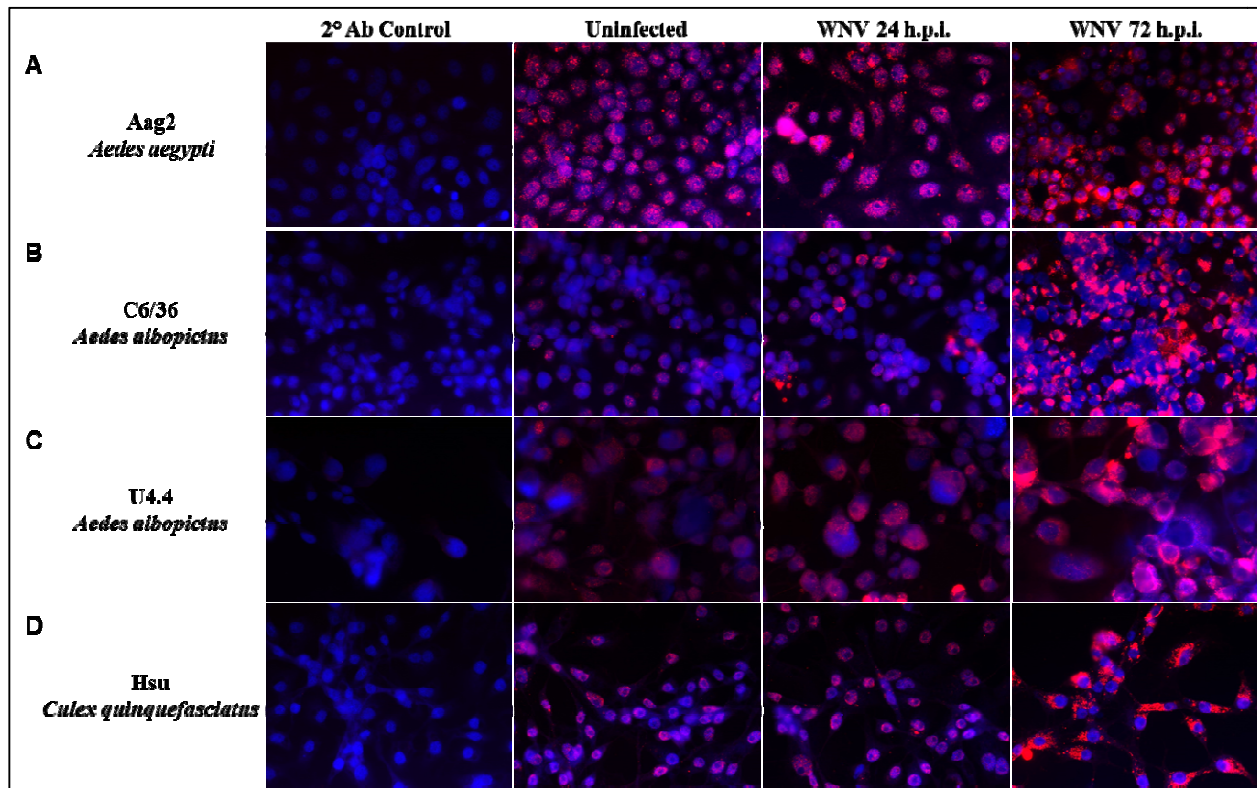

522

523 **Figure 1: Mosquito cell lines contain dsRNA.** Aag2 (A), C6/36 (B), U4.4 (C) and Hsu (D)

524 cells were infected with WNV and fixed at 24 or 72h post infection. Uninfected cells were fixed  
525 in parallel. All cells were stained with J2 primary antibody and rabbit anti-mouse Alex-Fluor 555  
526 secondary antibody. A secondary antibody only control (2° Ab Control) is shown to confirm that  
527 the observed fluorescence is not due to non-specific binding of the secondary antibody. All  
528 images were taken at 63X magnification.

529

530

531

532
